# Supplementary material for: Sulphur-Bridged BAl5S5+ with 17 Counting Electrons: A Regular Planar Pentacoordinate Boron System
Source: MDPI journal article supplement (doi:10.3390/molecules26175205), 2021-08-27
Supplement: s1 [file s1]

## **SUPPLEMENTARY MATERIALS**

### **Sulphur-bridged $\text{BAI}_5\text{S}_5^+$ with 17 counting electrons: a regular planar pentacoordinate boron system**

**Yuhan Ye, Yiqiao Wang, Min Zhang\*, Yun Geng and Zhongmin Su**

*Institute of Functional Material Chemistry, Faculty of Chemistry & National & Local United  
Engineering Laboratory for Power Battery, Northeast Normal University, Changchun 130024,  
P.R. China.*

E-mail: [mzhang@nenu.edu.cn](mailto:mzhang@nenu.edu.cn)

**Figure S1.** The optimized structures of four lowest isomers of PPC/B and quasi-PPC systems at B3LYP/def2-TZVP and the corresponding single point energies at CCSD/6-31g(d) and the lowest frequency. (Relative energies are listed in kcal mol<sup>-1</sup> and the minimum frequencies are listed in cm<sup>-1</sup>)

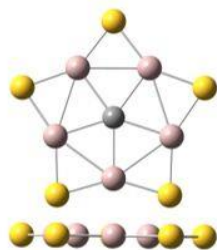

**1A**  $\text{CaI}_5\text{S}_5^{2+}$   $D_{5h}$   
 $\Delta E = 0.00$   
 $V_{\min} = 24.69$

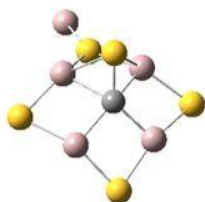

**1B**  $C_s$   
 $\Delta E = +14.68$   
 $V_{\min} = 20.41$

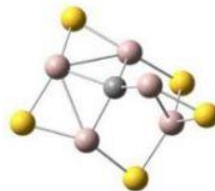

**1C**  $C_s$   
 $\Delta E = +30.23$   
 $V_{\min} = 54.49$

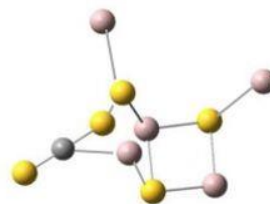

**1D**  $C_1$   
 $\Delta E = +51.09$   
 $V_{\min} = 8.99$

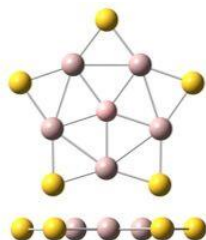

**2A**  $\text{BaI}_5\text{S}_5^+$   $D_{5h}$   
 $\Delta E = 0.00$   
 $V_{\min} = 35.61$

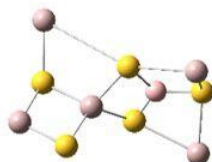

**2B**  $C_1$   
 $\Delta E = +28.90$   
 $V_{\min} = 19.70$

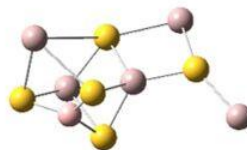

**2C**  $C_1$   
 $\Delta E = +29.80$   
 $V_{\min} = 17.39$

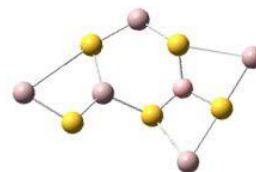

**2D**  $C_1$   
 $\Delta E = +45.00$   
 $V_{\min} = 8.90$

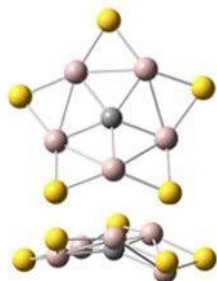

**3A**  $\text{CaI}_5\text{S}_5^+$   $C_1$   
 $\Delta E = 0.00$   
 $V_{\min} = 2.41$

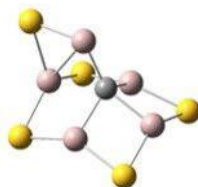

**3B**  $C_s$   
 $\Delta E = +16.10$   
 $V_{\min} = 60.02$

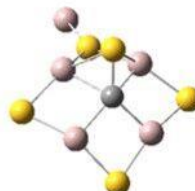

**3C**  $C_s$   
 $\Delta E = +39.60$   
 $V_{\min} = 27.06$

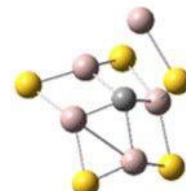

**3D**  $C_1$   
 $\Delta E = +41.45$   
 $V_{\min} = 46.72$

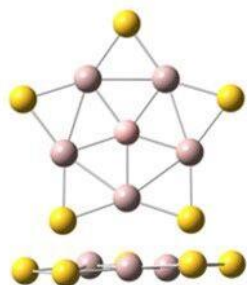

**4 BAl<sub>5</sub>S<sub>5</sub> C<sub>1</sub>**  
 $\Delta E = 0.00$   
 $V_{\min} = 7.94$

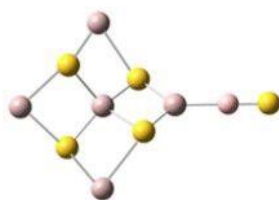

**4B C<sub>1</sub>**  
 $\Delta E = +37.59$   
 $V_{\min} = 22.63$

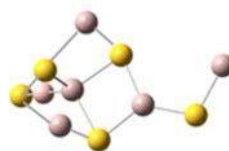

**4C C<sub>1</sub>**  
 $\Delta E = +40.89$   
 $V_{\min} = 18.85$

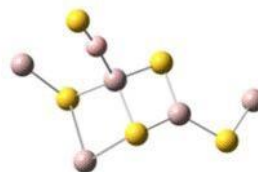

**4D C<sub>1</sub>**  
 $\Delta E = +41.99$   
 $V_{\min} = 13.26$

**Figure S2.** Born-Oppenheimer molecular dynamics (BOMD) simulations at different temperatures and their Root-mean-square deviations (RMSD) for four systems.

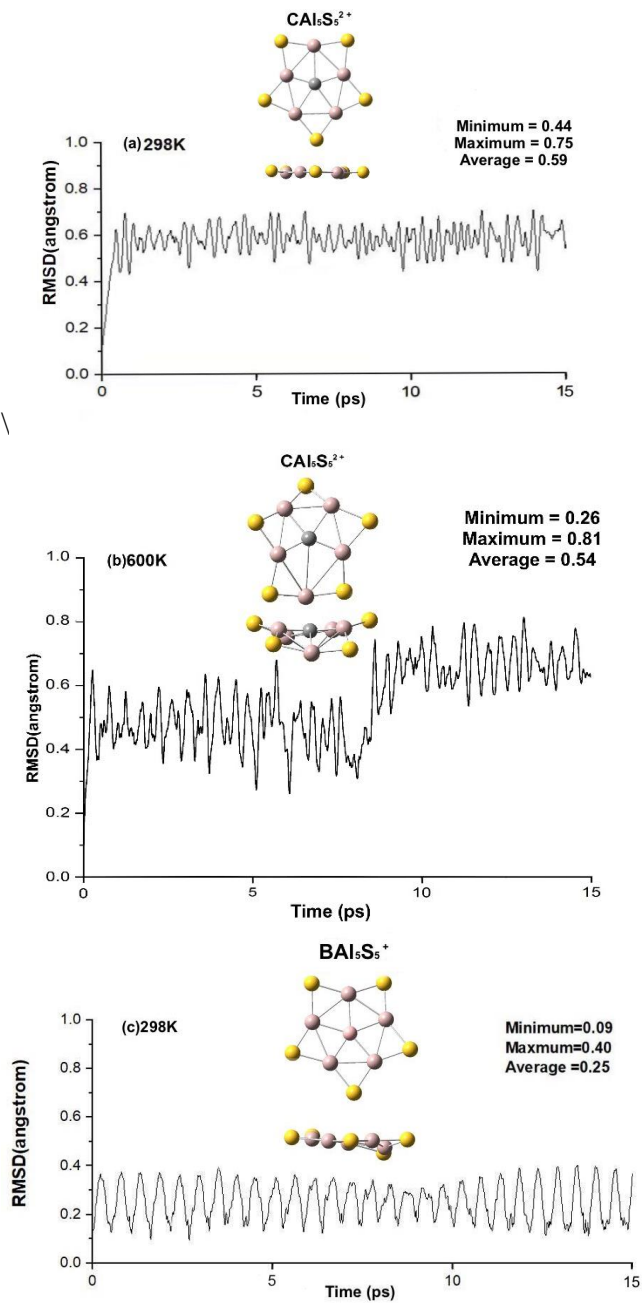

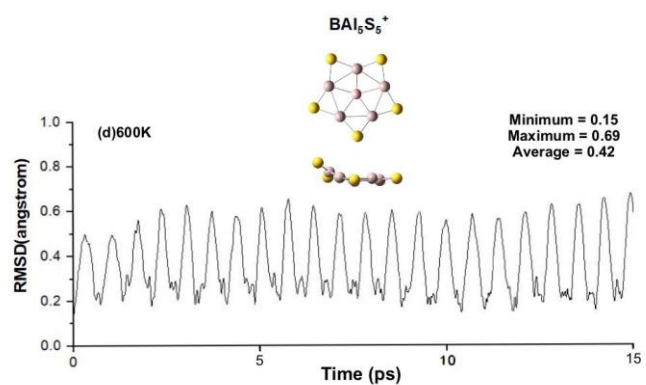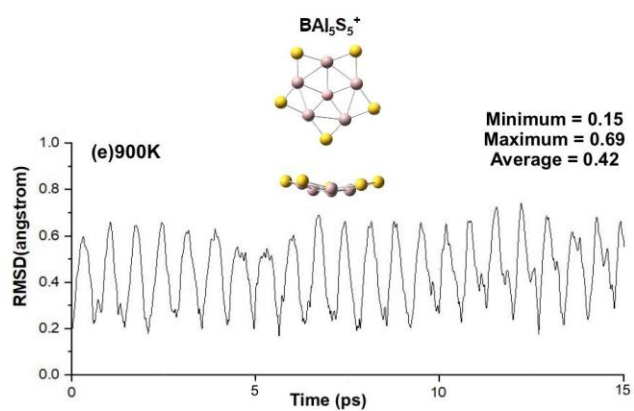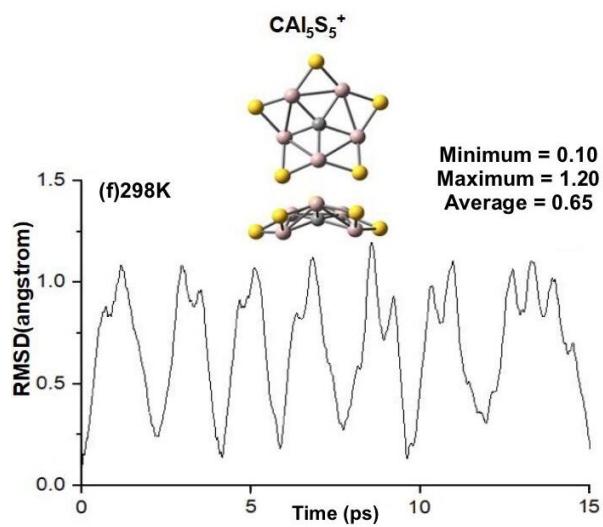

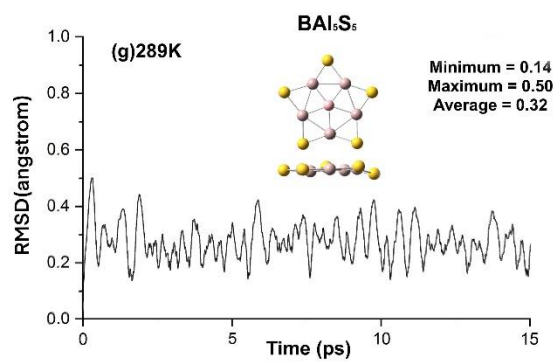

Figure S3. The  $\alpha$  electron profile and the corresponding energy of 6 highest occupied  $\pi$  MOs of  $\text{BAI}_5\text{S}_5^+$ .

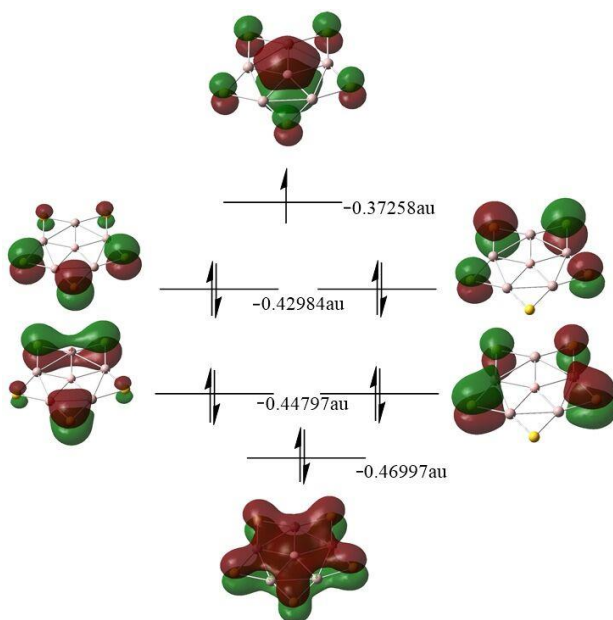

FigureS4. The electron profile and the corresponding energy of 6 highest occupied  $\pi$  MOs of  $\text{BAI}_5\text{S}_5$ .

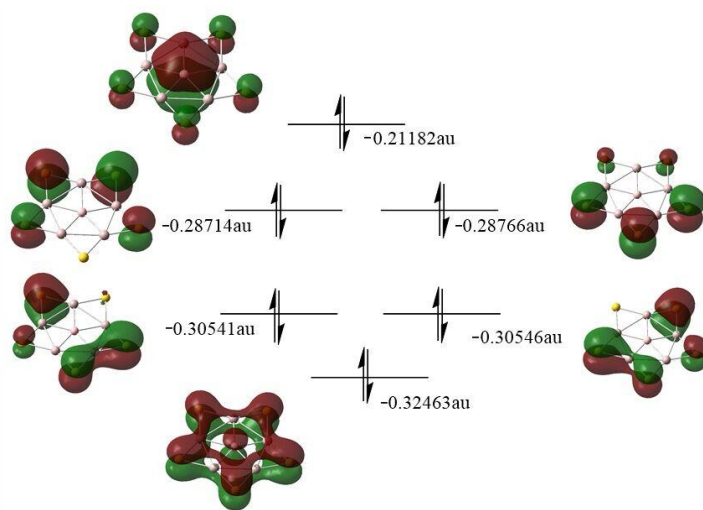

**Table S1.** The important information on the GEM structures of PPC/B and quasi-PPC systems at B3LYP/def2-TZVP level.

**1.  $\text{CAI}_5\text{S}_5^{2+}$**

( $D_{5h}$ ,  $^2A_2''$ )

$E_{\text{total with ZPE}} = -3241.261471$  Hartree  $\text{Freq}_{\text{min}} = 24.6879 \text{ cm}^{-1}$

|    |              |             |            |
|----|--------------|-------------|------------|
| C  | 0.00000000   | 0.00000000  | 0.00000000 |
| Al | 0.00000000   | 2.23120000  | 0.00000000 |
| Al | 2.121997300  | 0.68947871  | 0.00000000 |
| Al | -2.121997300 | 0.68947871  | 0.00000000 |
| Al | -1.311466455 | -1.80507872 | 0.00000000 |
| Al | 1.311466456  | -1.80507871 | 0.00000000 |
| S  | 2.058719183  | 2.83358386  | 0.00000000 |
| S  | -2.058719185 | 2.83358386  | 0.00000000 |
| S  | -3.331077613 | -1.08233272 | 0.00000000 |
| S  | 0.00000000   | -3.50250227 | 0.00000000 |
| S  | 3.331077613  | -1.08233272 | 0.00000000 |

**2.  $\text{BAI}_5\text{S}_5^+$**

( $D_{5h}$ ,  $^2A_2''$ )

$E_{\text{total with ZPE}} = -3228.429483$  Hartree  $\text{Freq}_{\text{min}} = 47.6385 \text{ cm}^{-1}$

|    |             |             |            |
|----|-------------|-------------|------------|
| B  | 0.00000000  | 0.00000019  | 0.00000000 |
| Al | -0.00000004 | 2.21284859  | 0.00000000 |
| Al | 2.10454387  | 0.68380800  | 0.00000000 |
| Al | -2.10454390 | 0.68380790  | 0.00000000 |
| Al | -1.30067961 | -1.79023179 | 0.00000000 |
| Al | 1.30067969  | -1.79023173 | 0.00000000 |
| S  | 2.07676105  | 2.85841668  | 0.00000000 |
| S  | -2.07676117 | 2.85841659  | 0.00000000 |
| S  | -3.36027004 | -1.09181781 | 0.00000000 |
| S  | 0.00000007  | -3.53319684 | 0.00000000 |
| S  | 3.36027009  | -1.09181766 | 0.00000000 |

**3.  $\text{CAI}_5\text{S}_5^+$**

( $C_1$ ,  $^1A$ )

$E_{\text{total with ZPE}} = -3241.699475$  Hartree  $\text{Freq}_{\text{min}} = 8.2409 \text{ cm}^{-1}$

|    |             |             |             |
|----|-------------|-------------|-------------|
| C  | 0.00183052  | 0.00607964  | -0.00022898 |
| Al | 0.62539807  | 2.01974485  | -0.00745236 |
| Al | -1.72684059 | 1.14419377  | -0.33295140 |
| Al | 2.06717006  | -0.02933438 | 0.34989116  |
| Al | 0.61258798  | -1.90045662 | -0.56768049 |
| Al | -1.57701658 | -1.23129851 | 0.55742595  |



|   |             |             |             |
|---|-------------|-------------|-------------|
| S | -1.09320251 | 3.20141134  | -0.56184501 |
| S | 2.70658908  | 2.02847855  | 0.56153558  |
| S | 2.77231980  | -1.94851426 | -0.34555980 |
| S | -0.99914694 | -3.24135668 | -0.01350604 |
| S | -3.38770491 | -0.04919371 | 0.35950640  |

#### 4. BAl<sub>5</sub>S<sub>5</sub>

(C<sub>1</sub>, <sup>1</sup>A)

E<sub>total with ZPE</sub> = -3228.685859 Hartree Freq<sub>min</sub> = 12.3348 cm<sup>-1</sup>

|    |             |             |             |
|----|-------------|-------------|-------------|
| B  | 0.00033891  | -0.00026289 | -0.00021126 |
| Al | 1.21666051  | 1.75701594  | 0.10837474  |
| Al | -1.29226048 | 1.70066384  | -0.13412062 |
| Al | 2.05382821  | -0.61724278 | -0.04214532 |
| Al | 0.04414126  | -2.13846365 | -0.04128160 |
| Al | -2.02197418 | -0.70228322 | 0.10781162  |
| S  | -0.07588540 | 3.52494250  | -0.02281492 |
| S  | 3.33015928  | 1.16351663  | 0.06089086  |
| S  | 2.13304280  | -2.80975896 | -0.07471912 |
| S  | -2.01144390 | -2.89706526 | 0.06119449  |
| S  | -3.37629990 | 1.01869901  | -0.02337932 |
